# Supplementary material for: Medusa–Aqua system: simultaneous measurement and evaluation of novel potential halogenated transient tracers HCFCs, HFCs, and PFCs in the ocean
Source: Copernicus journal article supplement (doi:10.5194/os-17-509-2021), 2021-04-09
Supplement: Supplementary file 1 [file os-17-509-2021-supplement.zip]

Archive with 3 entries (3 files):
- os-17-509-2021-supplement-title-page.pdf
- Supplement.pdf
- TableS7.xlsx
