# Supplementary material for: Medusa–Aqua system: simultaneous measurement and evaluation of novel potential halogenated transient tracers HCFCs, HFCs, and PFCs in the ocean
Source: Copernicus journal article supplement (doi:10.5194/os-17-509-2021), 2021-04-09
Supplement: Supplementary file 1 [file os-17-509-2021-supplement.zip › os-17-509-2021-supplement-title-page.pdf]

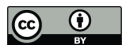

## *Supplement of*

# **Medusa–Aqua system: simultaneous measurement and evaluation of novel potential halogenated transient tracers HCFCs, HFCs, and PFCs in the ocean**

**Pingyang Li and Toste Tanhua**

*Correspondence to:* Toste Tanhua (ttanhua@geomar.de)

- os-17-509-2021-supplement-title-page.pdf
- Supplement.pdf
- TableS7.xlsx

The copyright of individual parts of the supplement might differ from the article licence.
