# Supplementary material for: Medusa–Aqua system: simultaneous measurement and evaluation of novel potential halogenated transient tracers HCFCs, HFCs, and PFCs in the ocean
Source: Copernicus journal article supplement (doi:10.5194/os-17-509-2021), 2021-04-09
Supplement: Supplementary file 1 [file os-17-509-2021-supplement.zip › TableS7.xlsx]

## Sheet: Cruise MSM72
													PT-GC-ECD				Medusa-Aqua
Station	Cast	Niskin	Latitude	Longitude	Year	Month	Day	Hour	Minute	Pressure	Salinity	Temperature	SF6	SF6q	CFC-12	CFC-12q	CFC-12	CFC-12q	HCFC-22	HCFC-22q	HCFC-141b	HCFC-141bq	HCFC-142b	HCFC-142bq	HFC-134a	HFC-134aq	HFC-125	HFC-125q
													pmol/kg		pmol/kg				pmol/kg		pmol/kg		pmol/kg		pmol/kg		pmol/kg
51	1	1	35.18	19.89	2018	3	16	2	2	2982.64	38.726	13.909	0.35	2	0.77	2
51	1	2	35.18	19.89	2018	3	16	2	2	2799.95	38.722	13.881	0.3	2	0.75	2
51	1	3	35.18	19.89	2018	3	16	2	2	2544.34	38.722	13.851	0.31	2	0.69	2
51	1	4	35.18	19.89	2018	3	16	2	2	2288.75	38.724	13.828	0.3	2	0.67	2
51	1	5	35.18	19.89	2018	3	16	2	2	2033.76	38.727	13.807	0.33	2	0.66	2
51	1	6	35.18	19.89	2018	3	16	2	2	1778.8	38.732	13.79	0.26	2	0.61	2
51	1	7	35.18	19.89	2018	3	16	2	2	1524.13	38.733	13.774	0.27	2	0.58	2
51	1	8	35.18	19.89	2018	3	16	2	2	1269.74	38.741	13.761	0.23	2	0.54	2
51	1	9	35.18	19.89	2018	3	16	2	2	1015.66	38.747	13.792	0.24	2	0.52	2
51	1	10	35.18	19.89	2018	3	16	2	2	761.89	38.769	13.91	0.36	2	0.64	2
51	1	11	35.18	19.89	2018	3	16	2	2	508.4	38.889	14.339	0.76	2	0.95	2
51	1	12	35.18	19.89	2018	3	16	2	2	407.07	38.938	14.646	0.95	2	1.11	2
51	1	13	35.18	19.89	2018	3	16	2	2	305.79	38.985	15.085	1.45	6	1.3	6
51	1	14	35.18	19.89	2018	3	16	2	2	204.49	39.008	15.708	1.74	2	1.35	2
51	1	15	35.18	19.89	2018	3	16	2	2	153.91	39.015	15.995	1.86	2	1.32	2
51	1	16	35.18	19.89	2018	3	16	2	2	103.39	38.943	15.908	1.89	2	1.35	2
51	1	17	35.18	19.89	2018	3	16	2	2	78.14	38.944	16.008	1.93	2	1.35	2
51	1	18	35.18	19.89	2018	3	16	2	2	52.9	38.944	16.111	1.84	2	1.31	2
51	1	19	35.18	19.89	2018	3	16	2	2	27.54	38.947	16.162	1.92	2	1.36	2
51	1	20	35.18	19.89	2018	3	16	2	2	12.31	38.941	16.15	1.88	2	1.36	2
52	1	4	35.29	19.42	2018	3	16	6	35	3056.44	38.724	13.919					NaN	9	NaN	9	NaN	9	NaN	9	NaN	9	NaN	9
52	1	5	35.29	19.42	2018	3	16	6	35	2544.71	38.723	13.852					NaN	9	NaN	9	NaN	9	NaN	9	NaN	9	NaN	9
52	1	6	35.29	19.42	2018	3	16	6	35	2034.36	38.726	13.813					NaN	9	NaN	9	NaN	9	NaN	9	NaN	9	NaN	9
52	1	7	35.29	19.42	2018	3	16	6	35	1524.78	38.741	13.791					NaN	9	NaN	9	NaN	9	NaN	9	NaN	9	NaN	9
52	1	8	35.29	19.42	2018	3	16	6	35	1016.08	38.758	13.802					NaN	9	NaN	9	NaN	9	NaN	9	NaN	9	NaN	9
52	1	9	35.29	19.42	2018	3	16	6	35	508.79	38.875	14.261					0.9525	2	2.1322	2	0.2791	2	0.2946	2	1.1759	2	0.3075	2
52	1	10	35.29	19.42	2018	3	16	6	35	407.53	38.914	14.5					0.4923	3	1.1134	3	0.1988	3	0.1228	3	0.7096	3	0.2066	3
52	1	11	35.29	19.42	2018	3	16	6	35	306.18	38.942	14.785					0.9468	5	3.7822	5	0.3267	5	0.2985	5	1.5569	5	0.3507	5
52	1	12	35.29	19.42	2018	3	16	6	35	204.99	38.99	15.302					NaN	9	NaN	9	NaN	9	NaN	9	NaN	9	NaN	9
52	1	13	35.29	19.42	2018	3	16	6	35	154.43	38.997	15.497					1.2346	5	4.9366	5	0.5931	5	0.4153	5	3.4829	5	0.3152	5
52	1	14	35.29	19.42	2018	3	16	6	35	103.86	38.993	15.862					1.3181	2	4.6309	2	0.5481	2	0.4398	2	3.5547	2	0.3602	2
52	1	16	35.29	19.42	2018	3	16	6	35	12.79	38.693	16.029					NaN	9	NaN	9	NaN	9	NaN	9	NaN	9	NaN	9
53	1	1	35.39	18.96	2018	3	16	11	48	3825.69	38.727	14.056	0.41	2	0.81	2
53	1	2	35.39	18.96	2018	3	16	11	48	3552.16	38.726	14.006	0.39	2	0.82	2
53	1	3	35.39	18.96	2018	3	16	11	48	3042.07	38.724	13.92	0.33	2	0.76	2
53	1	4	35.39	18.96	2018	3	16	11	48	2787.46	38.725	13.881	0.42	2	0.73	2
53	1	5	35.39	18.96	2018	3	16	11	48	2533.05	38.725	13.85	0.32	2	0.72	2
53	1	6	35.39	18.96	2018	3	16	11	48	2278.86	38.728	13.825	0.3	2	0.69	2
53	1	7	35.39	18.96	2018	3	16	11	48	2024.84	38.729	13.806	0.3	2	0.67	2
53	1	8	35.39	18.96	2018	3	16	11	48	1771.25	38.734	13.791	0.28	2	0.64	2
53	1	9	35.39	18.96	2018	3	16	11	48	1517.72	38.738	13.776	0.28	2	0.57	2
53	1	10	35.39	18.96	2018	3	16	11	48	1264.81	38.74	13.77	0.28	2	0.54	2
53	1	11	35.39	18.96	2018	3	16	11	48	1012.19	38.753	13.808	0.35	2	0.55	2
53	1	12	35.39	18.96	2018	3	16	11	48	759.69	38.774	13.911	NaN	9	NaN	9
53	1	13	35.39	18.96	2018	3	16	11	48	507.29	38.867	14.249	0.82	2	0.99	2
53	1	14	35.39	18.96	2018	3	16	11	48	406.41	38.914	14.539	1.06	2	1.15	2
53	1	15	35.39	18.96	2018	3	16	11	48	305.55	38.95	14.892	1.35	6	1.27	6
53	1	16	35.39	18.96	2018	3	16	11	48	204.91	38.998	15.527	1.59	2	1.35	2
53	1	17	35.39	18.96	2018	3	16	11	48	154.53	38.967	15.716	1.72	2	1.35	2
53	1	18	35.39	18.96	2018	3	16	11	48	104.39	38.713	15.499	1.4	3	1.32	2
53	1	19	35.39	18.96	2018	3	16	11	48	79.09	38.608	15.494	2.03	2	1.38	2
53	1	20	35.39	18.96	2018	3	16	11	48	53.93	38.563	15.6	1.99	2	1.39	2
53	1	21	35.39	18.96	2018	3	16	11	48	28.83	38.54	15.829	2.06	2	1.38	2
53	1	22	35.39	18.96	2018	3	16	11	48	13.84	38.525	16.021	NaN	9	NaN	9
53	1	23	35.39	18.96	2018	3	16	11	48	13.76	38.524	16.023	NaN	9	NaN	9
53	1	24	35.39	18.96	2018	3	16	11	48	13.72	38.526	16.018	1.89	2	1.34	2
83	2	1	38.75	10.61	2018	3	23	7	56	2492	38.493	13.32	0.64	2	0.84	2
83	2	2	38.75	10.61	2018	3	23	7	56	2279.06	38.502	13.328	0.46	2	0.73	2
83	2	3	38.75	10.61	2018	3	23	7	56	2023.91	38.516	13.343	0.36	2	0.63	2
83	2	4	38.75	10.61	2018	3	23	7	56	1768.95	38.532	13.357	0.32	2	0.6	2
83	2	5	38.75	10.61	2018	3	23	7	56	1517.21	38.546	13.37	0.32	2	0.6	2
83	2	6	38.75	10.61	2018	3	23	7	56	1264.97	38.562	13.387	0.34	2	0.58	2
83	2	7	38.75	10.61	2018	3	23	7	56	1010.54	38.594	13.471	0.4	2	0.63	2
83	2	8	38.75	10.61	2018	3	23	7	56	758.77	38.647	13.649	0.56	2	0.69	2
83	2	9	38.75	10.61	2018	3	23	7	56	506.98	38.727	13.952	0.97	2	0.88	2
83	2	10	38.75	10.61	2018	3	23	7	56	405.77	38.789	14.202	1.22	2	1.02	2
83	2	11	38.75	10.61	2018	3	23	7	56	305.09	38.831	14.394	1.4	6	1.1	6
83	2	12	38.75	10.61	2018	3	23	7	56	255.01	38.832	14.442	1.54	2	1.12	2
83	2	13	38.75	10.61	2018	3	23	7	56	203.45	38.809	14.44	1.44	2	1.14	2
83	2	14	38.75	10.61	2018	3	23	7	56	153.53	38.815	14.647	1.61	2	1.18	2
83	2	15	38.75	10.61	2018	3	23	7	56	103.18	38.647	14.593	1.66	2	1.29	2
83	2	16	38.75	10.61	2018	3	23	7	56	78.53	38.574	14.536	1.68	2	1.29	2
83	2	17	38.75	10.61	2018	3	23	7	56	53.12	38.35	14.233	1.91	2	1.42	2
83	2	18	38.75	10.61	2018	3	23	7	56	27.19	38.315	14.154	1.95	2	1.44	2
83	2	19	38.75	10.61	2018	3	23	7	56	13.37	38.3	14.133	2.06	2	1.41	2
84	1	5	38.7	9.98	2018	3	23	14	2	2298.69	38.52	13.402					0.6694	2	0.8826	2	0.0788	2	0.1669	2	1.2029	2	0.3253	2
84	1	6	38.7	9.98	2018	3	23	14	2	2025.92	38.539	13.423					0.5532	2	0.6776	2	0.0947	2	0.1413	2	1.2513	2	0.2868	2
84	1	7	38.7	9.98	2018	3	23	14	2	1518.96	38.563	13.43					NaN	9	NaN	9	NaN	9	NaN	9	NaN	9	NaN	9
84	1	8	38.7	9.98	2018	3	23	14	2	1266.5	38.591	13.499					0.5166	2	1.0308	2	0.0735	2	0.1547	2	1.095	2	0.2645	2
84	1	9	38.7	9.98	2018	3	23	14	2	1012.68	38.621	13.577					NaN	9	NaN	9	NaN	9	NaN	9	NaN	9	NaN	9
84	1	10	38.7	9.98	2018	3	23	14	2	810.51	38.663	13.722					NaN	9	NaN	9	NaN	9	NaN	9	NaN	9	NaN	9
84	1	11	38.7	9.98	2018	3	23	14	2	608.91	38.75	14.055					0.9729	5	2.2588	5	0.2462	5	0.255	5	16.9599	3	0.4082	3
84	1	12	38.7	9.98	2018	3	23	14	2	407.45	38.811	14.342					NaN	9	NaN	9	NaN	9	NaN	9	NaN	9	NaN	9
84	1	13	38.7	9.98	2018	3	23	14	2	206.16	38.79	14.699					1.1497	2	2.4835	2	0.3559	2	0.2921	2	1.6428	2	0.3418	2
84	1	14	38.7	9.98	2018	3	23	14	2	104.75	38.42	14.179					1.1569	5	3.4671	5	0.5932	5	0.3937	5	2.2373	5	0.3358	5
84	1	15	38.7	9.98	2018	3	23	14	2	54.88	38.405	14.154					1.1576	5	5.107	5	0.4958	5	0.3754	5	2.4611	5	0.35	5
84	1	16	38.7	9.98	2018	3	23	14	2	14.66	38.399	14.145					1.1138	5	4.5311	5	0.4714	5	0.3722	5	3.0535	5	0.3865	5
85	1	1	38.52	9.64	2018	3	23	18	9	1882.78	38.538	13.399	0.31	2	0.58	2
85	1	2	38.52	9.64	2018	3	23	18	9	1773.55	38.54	13.391	0.3	2	0.59	2
85	1	3	38.52	9.64	2018	3	23	18	9	1520.73	38.545	13.367	0.29	2	0.57	2
85	1	4	38.52	9.64	2018	3	23	18	9	1264.51	38.568	13.413	0.43	2	0.59	2
85	1	5	38.52	9.64	2018	3	23	18	9	1012.81	38.599	13.493	0.43	2	0.63	2
85	1	6	38.52	9.64	2018	3	23	18	9	761.29	38.665	13.72	0.69	2	0.75	2
85	1	7	38.52	9.64	2018	3	23	18	9	510.17	38.776	14.155	1.14	2	0.94	2
85	1	8	38.52	9.64	2018	3	23	18	9	408.91	38.809	14.306	1.42	2	1.06	2
85	1	9	38.52	9.64	2018	3	23	18	9	308.28	38.806	14.405	1.55	6	1.13	6
85	1	10	38.52	9.64	2018	3	23	18	9	207.16	38.767	14.554	1.67	2	1.23	2
85	1	11	38.52	9.64	2018	3	23	18	9	156.28	38.697	14.601	1.75	2	1.28	2
85	1	12	38.52	9.64	2018	3	23	18	9	105.91	38.49	14.461	1.88	2	1.37	2
85	1	13	38.52	9.64	2018	3	23	18	9	80.26	38.389	14.264	1.95	2	1.44	2
85	1	14	38.52	9.64	2018	3	23	18	9	56.39	38.389	14.26	1.87	2	1.4	2
85	1	15	38.52	9.64	2018	3	23	18	9	31.16	38.385	14.245	1.98	2	1.43	2
85	1	16	38.52	9.64	2018	3	23	18	9	16.3	38.384	14.231	1.92	2	1.4	2
105	1	1	38.45	3.59	2018	3	27	7	19	2643.24	38.491	13.322	0.71	2	0.88	2
105	1	2	38.45	3.59	2018	3	27	7	19	2533.04	38.491	13.304	0.66	2	0.89	2
105	1	3	38.45	3.59	2018	3	27	7	19	2278.6	38.49	13.263	0.62	2	0.84	2
105	1	4	38.45	3.59	2018	3	27	7	19	2024.93	38.489	13.225	0.57	2	0.85	2
105	1	5	38.45	3.59	2018	3	27	7	19	1771.08	38.49	13.193	0.6	2	0.83	2
105	1	6	38.45	3.59	2018	3	27	7	19	1518.08	38.49	13.159	0.53	2	0.78	2
105	1	7	38.45	3.59	2018	3	27	7	19	1265.03	38.499	13.163	0.5	2	0.75	2
105	1	8	38.45	3.59	2018	3	27	7	19	1012.57	38.52	13.214	0.52	2	0.74	2
105	1	9	38.45	3.59	2018	3	27	7	19	759.59	38.553	13.321	0.58	2	0.8	2
105	1	10	38.45	3.59	2018	3	27	7	19	507.87	38.576	13.447	0.93	2	0.97	2
105	1	11	38.45	3.59	2018	3	27	7	19	406.78	38.576	13.518	1.08	2	1.08	2
105	1	12	38.45	3.59	2018	3	27	7	19	306.01	38.566	13.691	1.26	6	1.17	6
105	1	13	38.45	3.59	2018	3	27	7	19	204.97	38.381	13.717	1.76	2	1.36	2
105	1	14	38.45	3.59	2018	3	27	7	19	154.61	38.081	13.728	1.85	2	1.41	2
105	1	15	38.45	3.59	2018	3	27	7	19	104.36	37.857	14.301	2	2	1.4	2
105	1	16	38.45	3.59	2018	3	27	7	19	79.11	37.749	14.254	1.89	2	1.43	2
105	1	17	38.45	3.59	2018	3	27	7	19	54.32	37.722	14.273	2	2	1.41	2
105	1	18	38.45	3.59	2018	3	27	7	19	29.56	37.709	14.269	1.97	2	1.38	2
105	1	19	38.45	3.59	2018	3	27	7	19	14.31	37.702	14.275	1.96	2	1.43	2
106	1	1	38.4	3.2	2018	3	27	11	55	2737.22	38.492	13.338					0.4984	3	1.0354	3	0.0893	3	0.0869	3	0.8958	3	0.1591	3
106	1	3	38.4	3.2	2018	3	27	11	55	2533.46	38.491	13.303					0.6566	5	1.5419	5	0.1807	5	0.1512	5	1.8121	5	0.2137	5
106	1	4	38.4	3.2	2018	3	27	11	55	1517.89	38.486	13.143					NaN	9	NaN	9	NaN	9	NaN	9	NaN	9	NaN	9
106	1	5	38.4	3.2	2018	3	27	11	55	1011.99	38.515	13.191					0.7171	2	1.0931	2	0.1155	2	0.1561	2	1.3361	2	0.2553	2
106	1	6	38.4	3.2	2018	3	27	11	55	759.78	38.552	13.314					0.7298	2	1.2602	2	0.1319	2	0.1523	2	1.5194	2	0.2684	2
106	1	7	38.4	3.2	2018	3	27	11	55	508.04	38.599	13.522					0.7995	5	1.7714	5	0.2024	5	0.208	5	1.7827	5	0.2909	5
106	1	8	38.4	3.2	2018	3	27	11	55	507.61	38.6	13.524					0.8428	2	1.9614	2	0.1469	2	0.1828	2	1.1564	2	0.2641	2
106	1	9	38.4	3.2	2018	3	27	11	55	356.6	38.603	13.683					0.9007	5	3.0156	5	0.3427	5	0.237	5	1.6905	5	0.2536	5
106	1	10	38.4	3.2	2018	3	27	11	55	204.98	38.35	13.661					NaN	9	NaN	9	NaN	9	NaN	9	NaN	9	NaN	9
106	1	11	38.4	3.2	2018	3	27	11	55	104.03	37.895	14.011					0.9692	5	4.2464	5	0.3579	5	0.2686	5	2.0954	5	0.248	5
106	1	12	38.4	3.2	2018	3	27	11	55	13.95	37.309	14.495					1.0014	5	4.324	5	0.4249	5	0.3097	5	2.1484	5	0.2595	5
107	1	1	38.32	2.9	2018	3	27	16	12	2770.39	38.491	13.344	0.67	2	0.9	2
107	1	2	38.32	2.9	2018	3	27	16	12	2532.3	38.491	13.303	0.69	2	0.91	2
107	1	3	38.32	2.9	2018	3	27	16	12	2278.63	38.49	13.259	0.63	2	0.86	2
107	1	4	38.32	2.9	2018	3	27	16	12	2025.06	38.487	13.214	0.61	2	0.84	2
107	1	5	38.32	2.9	2018	3	27	16	12	1771.11	38.486	13.177	0.62	2	0.83	2
107	1	6	38.32	2.9	2018	3	27	16	12	1518.08	38.486	13.145	0.53	2	0.8	2
107	1	7	38.32	2.9	2018	3	27	16	12	1264.69	38.493	13.139	0.49	2	0.73	2
107	1	8	38.32	2.9	2018	3	27	16	12	1012.33	38.514	13.189	0.49	2	0.74	2
107	1	9	38.32	2.9	2018	3	27	16	12	759.42	38.543	13.276	0.57	2	0.75	2
107	1	10	38.32	2.9	2018	3	27	16	12	507.31	38.586	13.462	0.79	2	0.86	2
107	1	11	38.32	2.9	2018	3	27	16	12	406.61	38.596	13.552	0.97	2	1	2
107	1	12	38.32	2.9	2018	3	27	16	12	356.14	38.605	13.645	1.1	6	1.06	6
107	1	13	38.32	2.9	2018	3	27	16	12	305.52	38.578	13.635	1.16	2	1.1	2
107	1	14	38.32	2.9	2018	3	27	16	12	204.49	38.447	13.628	1.62	2	1.34	2
107	1	15	38.32	2.9	2018	3	27	16	12	154.65	38.332	13.715	1.8	2	1.43	2
107	1	16	38.32	2.9	2018	3	27	16	12	103.88	38.091	14.125	1.83	2	1.4	2
107	1	17	38.32	2.9	2018	3	27	16	12	78.54	37.792	14.301	1.91	2	1.43	2
107	1	18	38.32	2.9	2018	3	27	16	12	53.76	37.384	14.382	2.05	2	1.43	2
107	1	19	38.32	2.9	2018	3	27	16	12	29.01	37.163	14.46	2.04	2	1.39	2
107	1	20	38.32	2.9	2018	3	27	16	12	13.83	37.159	14.473	2.23	2	1.47	2

## Sheet: Cruise AL516
														Medusa-Aqua
Profile	Cast	Niskin	Latitude	Longitude	Year	Month	Day	Hour	Minute	Second	Pressure	Salinity	Temperature	CFC-12	CFC-12q	HCFC-22	HCFC-22q	HCFC-141b	HCFC-141bq	HCFC-142b	HCFC-142bq	HFC-134a	HFC-134aq	HFC-125	HFC-125q
																pmol/kg		pmol/kg		pmol/kg		pmol/kg		pmol/kg
30	4	1	54.522	10.067	2018	9	15	16	15	29	23.506	23.3372	12.6108	NaN	9	NaN	9	NaN	9	NaN	9	NaN	9	NaN	9
30	4	2	54.522	10.067	2018	9	15	16	18	31	23.51	23.3373	12.6126	NaN	9	NaN	9	NaN	9	NaN	9	NaN	9	NaN	9
30	4	3	54.522	10.067	2018	9	15	16	21	33	23.495	23.337	12.6118	NaN	9	NaN	9	NaN	9	NaN	9	NaN	9	NaN	9
30	4	4	54.522	10.067	2018	9	15	16	23	34	23.507	23.337	12.6108	2.25017	2	10.0016	2	0.804482	2	0.529652	2	2.79779	2	0.412358	2
30	4	5	54.522	10.067	2018	9	15	16	24	36	23.505	23.3369	12.6106	NaN	9	NaN	9	NaN	9	NaN	9	NaN	9	NaN	9
30	4	6	54.522	10.067	2018	9	15	16	26	37	23.509	23.3371	12.6086	2.26161	2	9.5773	2	0.876464	2	0.516221	2	2.43992	2	0.42398	2
30	4	7	54.522	10.067	2018	9	15	18	25	38	1.651	18.2892	17.1437	NaN	9	NaN	9	NaN	9	NaN	9	NaN	9	NaN	9
30	4	8	54.522	10.067	2018	9	15	18	27	40	1.621	18.2893	17.1432	NaN	9	NaN	9	NaN	9	NaN	9	NaN	9	NaN	9
30	4	9	54.522	10.067	2018	9	15	18	29	41	1.665	18.2888	17.1458	NaN	9	NaN	9	NaN	9	NaN	9	NaN	9	NaN	9
30	4	10	54.522	10.067	2018	9	15	18	31	42	1.635	18.2892	17.145	NaN	9	NaN	9	NaN	9	NaN	9	NaN	9	NaN	9
30	4	11	54.522	10.067	2018	9	15	18	33	43	1.653	18.2898	17.1455	NaN	9	NaN	9	NaN	9	NaN	9	NaN	9	NaN	9
30	4	12	54.522	10.067	2018	9	15	18	34	45	1.619	18.2898	17.1455	2.16758	2	7.07265	2	0.539548	2	0.456823	2	3.0099	2	0.473899	2
